# Supplementary material
Source: PubMed Central journal article supplement (PMC5641968)
Supplement: NIHMS331906-supplement-Supp_Figure_S1-S2.pdf [file NIHMS331906-supplement-Supp_Figure_S1-S2.pdf]

## Supplementary Material

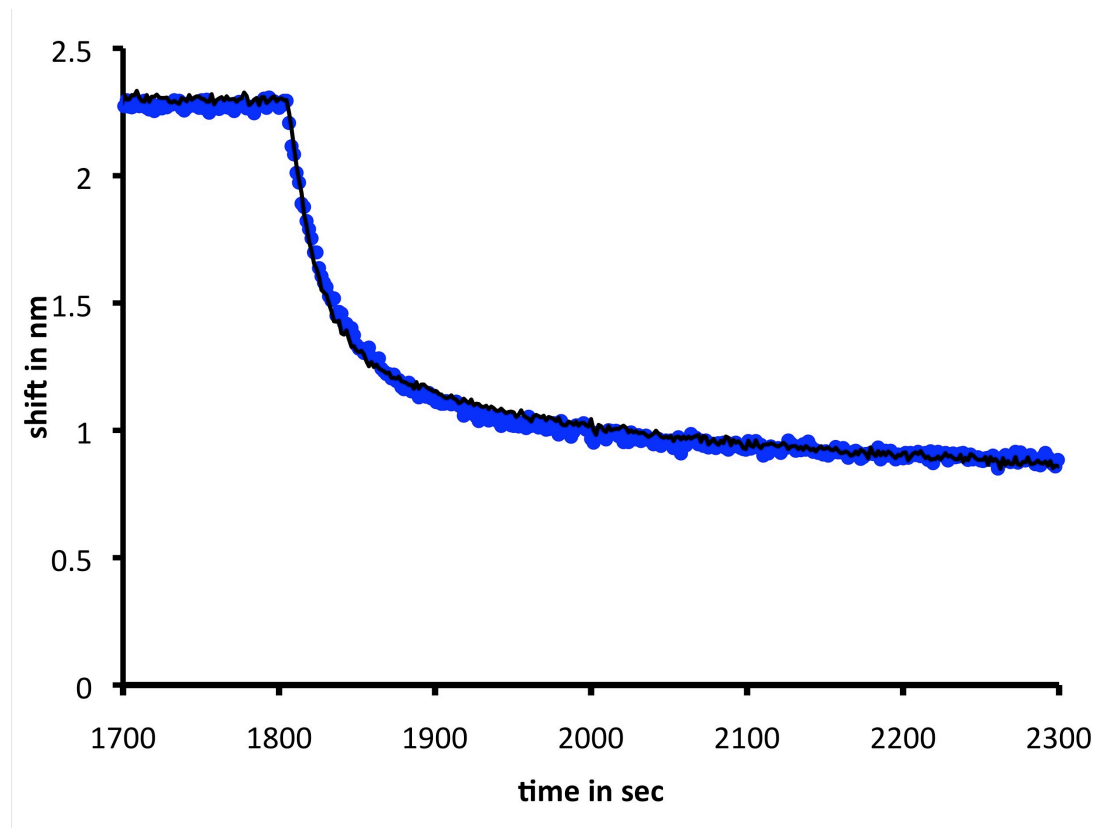

**Supplementary Figure 1:** Time course of eNOS detachment from CaM after transfer of sensor to solution containing EGTA (black) or EDTA (blue). Amplitude of EDTA trace was slightly adjusted (reduced by 10%) to make it easier to compare the time course; this adjustment was necessary because of variations in the amount of CaM crosslinked to the sensors. There is no difference in the time course or extent of dissociation in EGTA and EDTA.

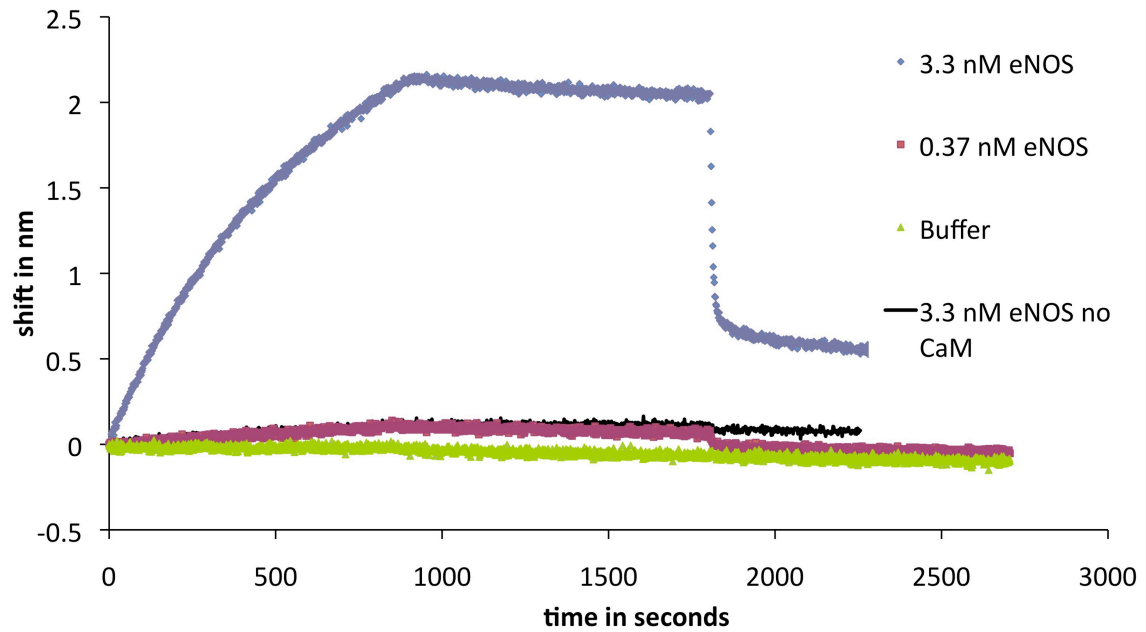

**Supplementary Figure 2:** Comparison of CaM dependent and non-specific binding of eNOS to biosensor surfaces. Non specific binding at 3.3 nM eNOS to undecorated surfaces is 5-10% of the CaM dependent binding and is not reversible with EDTA. Binding of eNOS at low concentrations (here 0.37 nM) is essentially fully reversible with EDTA and hence cannot include a detectable non-specific component.
